# Supplementary material for: Heck, Suzuki and Sonogashira cross-coupling reactions using ppm level of SBA-16 supported Pd-complex
Source: Royal Society of Chemistry journal article supplement (doi:10.1039/c4nj02319f), 2015-01-01
Supplement: c4nj02319f1.pdf [file c4nj02319f1.pdf]

# Heck, Suzuki and Sonogashira Cross-Coupling Reactions using ppm Level of SBA-16 Supported Pd-Complex

Shaheen M. Sarkar,\* Md Lutfor Rahman, Mashitah Mohd Yusoff

Faculty of Industrial Sciences and Technology, University Malaysia Pahang, Gambang 26300, Kuantan,  
Malaysia

\*Corresponding author: E-mail: sha\_inha@yahoo.com

## Supplementary material

**Table 1:** Structural information of the SBA-16 supported Pd complex **3**

| Sample   | Surface area          | Pore diameter | Pore volume             | Functional group |
|----------|-----------------------|---------------|-------------------------|------------------|
| SBA-16   | 820 m <sup>2</sup> /g | 5.13 nm       | 0.73 cm <sup>3</sup> /g | -                |
| <b>1</b> | 655 m <sup>2</sup> /g | 3.97 nm       | 0.43 cm <sup>3</sup> /g | 0.7 mmol/g       |
| <b>2</b> | 520 m <sup>2</sup> /g | 3.55 nm       | 0.35 cm <sup>3</sup> /g | 0.4 mmol/g       |
| <b>3</b> | 465 m <sup>2</sup> /g | 3.10 nm       | 0.28 cm <sup>3</sup> /g | 0.25 mmol/g      |

**Table 2.** Heck coupling of iodobenzene with methyl acrylate<sup>a</sup>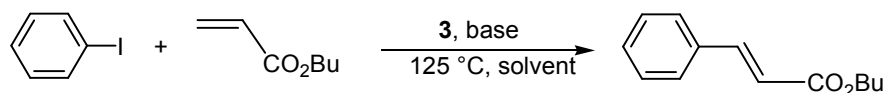

| Entry | Solvent (1:1)             | Base                            | <b>3</b> (mol%) | Time (h) | Yield (%) <sup>b</sup> |
|-------|---------------------------|---------------------------------|-----------------|----------|------------------------|
| 1     | DMA:H <sub>2</sub> O      | Na <sub>2</sub> CO <sub>3</sub> | 1.5             | 0.8      | 100                    |
| 2     | DMA:H <sub>2</sub> O      | Na <sub>2</sub> CO <sub>3</sub> | 1.0             | 1.5      | 98(96) <sup>c</sup>    |
| 3     | DMA:H <sub>2</sub> O      | Na <sub>2</sub> CO <sub>3</sub> | 0.3             | 2        | 90                     |
| 4     | DMA:H <sub>2</sub> O      | Na <sub>2</sub> CO <sub>3</sub> | 0.1             | 2.5      | 81                     |
| 5     | DMA:H <sub>2</sub> O      | Na <sub>2</sub> CO <sub>3</sub> | 0.05            | 4        | 95                     |
| 6     | DMA:H <sub>2</sub> O      | Na <sub>2</sub> CO <sub>3</sub> | 0.01            | 5        | 89(85) <sup>c</sup>    |
| 7     | DMA:H <sub>2</sub> O      | K <sub>2</sub> CO <sub>3</sub>  | 1.0             | 1.5      | 95                     |
| 8     | DMA:H <sub>2</sub> O      | NaOMe                           | 1.0             | 1.5      | 95                     |
| 9     | DMA:H <sub>2</sub> O      | Na <sub>2</sub> PO <sub>4</sub> | 1.0             | 1.5      | 93                     |
| 10    | DMA:H <sub>2</sub> O      | K <sub>2</sub> PO <sub>4</sub>  | 1.0             | 1.5      | 92                     |
| 11    | DMSO:H <sub>2</sub> O     | Na <sub>2</sub> CO <sub>3</sub> | 1.0             | 1.5      | 95                     |
| 12    | NMP:H <sub>2</sub> O      | Na <sub>2</sub> CO <sub>3</sub> | 1.0             | 1.5      | 94                     |
| 13    | DMF:H <sub>2</sub> O      | Na <sub>2</sub> CO <sub>3</sub> | 1.0             | 1.5      | 96                     |
| 14    | Dodacane:H <sub>2</sub> O | Na <sub>2</sub> CO <sub>3</sub> | 1.0             | 6        | 82                     |

<sup>a</sup>All reactions were carried using 1 mmol of iodobenzene, 1.3 mmol of butyl acrylate, a catalytic amount of **3** and 2 mmol of base in 2 mL of solvent. <sup>b</sup> GC yield determined using *n*-decane as an internal standard and based on the amount of iodobenzene employed. <sup>c</sup> Isolated yield.

*(E)*-3-Phenylacrylic acid *n*-butyl ester **4a** [1]: <sup>1</sup>H NMR (500 MHz, CDCl<sub>3</sub>) δ = 7.70 (d, *J* = 16.0 Hz, 1 H), 7.53-7.51 (m, 2 H), 7.39-7.36 (m, 3 H), 6.46 (d, *J* = 16.05 Hz, 1 H), 4.21 (t, *J* = 6.9 Hz, 2 H), 1.72-1.67 (m, 2 H), 1.47-1.40 (sextet, *J* = 7.45 Hz, 2 H), 0.96 (t, *J* = 7.45 Hz, 3 H). <sup>13</sup>C NMR (125 MHz, CDCl<sub>3</sub>) δ: 167.07, 144.51, 134.45, 130.16, 1128.84, 128.02, 118.28, 64.39, 30.75, 19.17, 13.72. EI-MS *m/z* = 204 (M<sup>+</sup>).

*(E)*-3-(4'-tolyl)acrylic acid *n*-butyl ester **4b** [1]: <sup>1</sup>H NMR (500 MHz, CDCl<sub>3</sub>) δ = 7.67 (d, *J* = 16.05 Hz, 1 H), 7.43 (d, *J* = 8.10 Hz, 2 H), 7.19 (d, *J* = 8.05 Hz, 2 H), 6.40 (d, *J* = 16.0 Hz, 1 H), 4.20 (t, *J* = 6.3 Hz, 2 H), 2.36 (s, 3 H), 1.71-1.65 (m, 2 H), 1.47-1.40 (m, 2 H), 0.94 (t, *J* = 7.45 Hz, 3 H). <sup>13</sup>C NMR (125 MHz, CDCl<sub>3</sub>) δ: 167.28, 144.52, 140.58, 131.73, 129.57, 128.02, 117.18, 64.32,

30.77, 21.42, 19.18, 13.73. EI-MS  $m/z = 218$  ( $M^+$ ).

*(E)*-3-(4'-Methoxyphenyl)acrylic acid *n*-butyl ester **4c** [1]:  $^1\text{H}$  NMR (500 MHz,  $\text{CDCl}_3$ )  $\delta = 7.65$  (d,  $J = 16.0$  Hz, 1 H), 7.48 (d,  $J = 8.6$  Hz, 2 H), 6.90 (d,  $J = 8.5$  Hz, 2 H), 6.32 (d,  $J = 16.0$  Hz, 1 H), 4.19 (t,  $J = 7.0$  Hz, 2 H), 3.83 (s, 3 H), 1.71-1.65 (m, 2 H), 1.45-1.41 (sextet,  $J = 7.5$  Hz, 2 H), 0.96 (t,  $J = 7.5$  Hz, 3 H).  $^{13}\text{C}$  NMR (125 MHz,  $\text{CDCl}_3$ )  $\delta$ : 167.42, 161.29, 144.17, 129.66, 127.20, 115.76, 114.28, 64.23, 55.33, 30.79, 19.18, 13.73. EI-MS  $m/z = 234$  ( $M^+$ ).

*(E)*-3-(4'-Nitrophenyl)acrylic acid *n*-butyl ester **4d** [1]:  $^1\text{H}$  NMR (500 MHz,  $\text{CDCl}_3$ )  $\delta = 8.25$  (d,  $J = 8.55$  Hz, 2 H), 7.72-7.66 (m, 3 H), 6.58 (d,  $J = 16.0$  Hz, 1 H), 4.24 (t,  $J = 6.3$  Hz, 2 H), 1.73-1.67 (m, 2 H), 1.48-1.42 (m, 2 H), 0.97 (t,  $J = 7.7$  Hz, 3 H).  $^{13}\text{C}$  NMR (125 MHz,  $\text{CDCl}_3$ )  $\delta$ : 166.10, 148.47, 141.56, 140.59, 128.60, 124.14, 122.61, 64.90, 30.68, 19.15, 13.70. EI-MS  $m/z = 249$  ( $M^+$ ).

*(E)*-3-(4-Acetylphenyl)acrylic acid *n*-butyl ester **4e** [1]:  $^1\text{H}$  NMR (500 MHz,  $\text{CDCl}_3$ )  $\delta = 7.97$  (d,  $J = 8.0$  Hz, 2 H), 7.71 (d,  $J = 16.5$  Hz, 1 H), 7.621 (d,  $J = 8.0$  Hz, 2 H), 6.54 (d,  $J = 16.05$  Hz, 1 H), 4.22 (t,  $J = 6.9$  Hz, 2 H), 2.61 (s, 3 H), 1.72-1.67 (m, 2 H), 1.46-1.42 (m, 2 H), 0.97 (t,  $J = 7.45$  Hz, 3 H).  $^{13}\text{C}$  NMR (125 MHz,  $\text{CDCl}_3$ )  $\delta$ : 197.28, 166.55, 142.93, 138.79, 137.94, 128.82, 128.08, 120.82, 64.65, 30.71, 26.64, 19.15, 13.70. EI-MS  $m/z = 246$  ( $M^+$ ).

*(E)*-3-(4'-Trifluoromethylphenyl)acrylic acid *n*-butyl ester **4f** [1]:  $^1\text{H}$  NMR (500 MHz,  $\text{CDCl}_3$ )  $\delta = 7.70$  (d,  $J = 15.0$  Hz, 1 H), 7.65-7.61 (m, 4 H), 6.52 (d,  $J = 16.0$  Hz, 1 H), 4.23 (t,  $J = 6.7$  Hz, 2 H), 1.72-1.64 (m, 2 H), 1.48-1.40 (sextet,  $J = 7.5$  Hz, 2 H), 0.97 (t,  $J = 7.45$  Hz, 3 H).  $^{13}\text{C}$  NMR (125 MHz,  $\text{CDCl}_3$ )  $\delta$ : 166.48, 142.63, 137.83, 131.81 (q,  $J = 23.2$  Hz), 128.13, 125.86 (q,  $J = 3.57$  Hz), 124.89, 122.72, 120.86, 64.69, 30.71, 19.15, 13.69. EI-MS  $m/z = 272$  ( $M^+$ ).

*n*-Butyl *trans*-3-(3-pyridinyl)acrylate **4g** [2]:  $^1\text{H}$  NMR (500 MHz,  $\text{CDCl}_3$ )  $\delta = 8.75$  (s, 1 H), 8.61-8.60 (m, 1 H), 7.84 (d,  $J = 7.5$  Hz, 1 H), 7.68 (d,  $J = 16.1$  Hz, 1 H), 7.34-7.32 (m, 1 H), 6.53 (d,  $J = 16.1$  Hz, 1 H), 4.23 (t,  $J = 7.0$  Hz, 2 H), 1.72-1.67 (quint,  $J = 6.5$  Hz, 2 H), 1.47-1.40 (sextet,  $J = 7.5$  Hz, 2 H), 0.97 (t,  $J = 7.5$  Hz, 3 H).  $^{13}\text{C}$  NMR (125 MHz,  $\text{CDCl}_3$ ) 166.37, 150.93, 149.68, 140.78, 134.16, 130.21, 123.69, 120.48, 64.68, 30.69, 19.15, 13.70. EI-MS  $m/z = 205$  ( $M^+$ ).

(*E*)-*N*-Isopropyl-cinnamamide **4h**:  $^1\text{H}$  NMR (500 MHz,  $\text{CDCl}_3$ )  $\delta$  = 7.62 (d,  $J$  = 15.5 Hz, 1 H), 7.48-7.47 (m, 2 H), 7.36-7.33 (m, 3 H), 6.39 (d,  $J$  = 16.6 Hz, 1 H), 5.62 (brs, 1 H), 4.26-4.19 (m, 1 H), 1.22 (d,  $J$  = 6.3 Hz, 6 H).  $^{13}\text{C}$  NMR (125 MHz,  $\text{CDCl}_3$ )  $\delta$ : 164.98, 140.63, 134.91, 129.48, 128.74, 127.68, 121.06, 41.54, 22.81. EI-MS  $m/z$  = 189 ( $\text{M}^+$ ).

(*E*)-*N*-isopropyl-3-(*p*-tolyl)acrylamide **4i**:  $^1\text{H}$  NMR (500 MHz,  $\text{CDCl}_3$ )  $\delta$  = 7.48 (d,  $J$  = 15.5 Hz, 1 H), 7.39 (d,  $J$  = 8.0 Hz, 2 H), 7.16 (d,  $J$  = 7.45 Hz, 2 H) 6.32 (d,  $J$  = 15.45 Hz, 1 H), 5.46 (brs, 1 H), 4.25-4.19 (m, 1 H), 2.35 (s, 3 H), 1.22 (d,  $J$  = 6.3 Hz, 6 H).  $^{13}\text{C}$  NMR (125 MHz,  $\text{CDCl}_3$ )  $\delta$ : 165.15, 140.63, 139.77, 132.15, 129.48, 127.66, 119.97, 41.50, 22.85, 21.36. EI-MS  $m/z$  = 203 ( $\text{M}^+$ ).

(*E*)-*N*-isopropyl-3-(4-methoxyphenyl)acrylamide **4j**:  $^1\text{H}$  NMR (500 MHz,  $\text{CDCl}_3$ )  $\delta$  = 7.58 (d,  $J$  = 16.05 Hz, 1 H), 7.43 (d,  $J$  = 8.6 Hz, 2 H), 6.86 (d,  $J$  = 8.6 Hz, 2 H), 6.26 (d,  $J$  = 16.0 Hz, 1 H), 5.56 (brs, 1 H), 4.25-4.18 (m, 1 H), 3.81 (s, 3 H), 1.22 (d,  $J$  = 6.85 Hz, 6 H).  $^{13}\text{C}$  NMR (125 MHz,  $\text{CDCl}_3$ )  $\delta$ : 165.31, 160.72, 140.22, 129.20, 127.62, 118.69, 114.17, 55.30, 41.46, 22.84. EI-MS  $m/z$  = 219 ( $\text{M}^+$ ).

(*E*)-Stilbene **4k** [2]:  $^1\text{H}$  NMR (500 MHz,  $\text{CDCl}_3$ )  $\delta$  = 7.51 (d,  $J$  = 7.4 Hz, 4 H), 7.36-7.33 (m, 4 H), 7.27-7.25 (m, 2 H), 7.10 (d,  $J$  = 11.5 Hz, 2 H).  $^{13}\text{C}$  NMR (125 MHz,  $\text{CDCl}_3$ )  $\delta$ : 137.38, 128.65, 127.6, 126.49. EI-MS  $m/z$  = 180 ( $\text{M}^+$ ).

(*E*)-1-Styryl-4-(trifluoromethyl)benzene **4l** [2]:  $^1\text{H}$  NMR (500 MHz,  $\text{CDCl}_3$ )  $\delta$  = 7.60 (m, 4 H), 7.54 (d,  $J$  = 7.7 Hz, 2 H), 7.38 (t,  $J$  = 7.4 Hz, 2 H), 7.30 (t,  $J$  = 7.5 Hz, 1 H), 7.21 (d,  $J$  = 16.5 Hz, 1 H), 7.13 (d,  $J$  = 16.5 Hz, 1 H).  $^{13}\text{C}$  NMR (125 MHz,  $\text{CDCl}_3$ )  $\delta$ : 136.62, 131.19, 128.78, 128.27, 127.11, 126.76, 126.56, 125.63 (q,  $J$  = 3.57 Hz, C-F), 123.12. EI-MS  $m/z$  = 248 ( $\text{M}^+$ ).

(*E*)-4-Methylstilbene **4m** [2]:  $^1\text{H}$  NMR (500 MHz,  $\text{CDCl}_3$ )  $\delta$  = 7.51 (d,  $J$  = 8.0 Hz, 2 H), 7.42 (d,  $J$  = 7.5 Hz, 2 H), 7.34 (t,  $J$  = 8.0 Hz, 2 H), 7.25-7.22 (m, 1 H), 7.16 (d,  $J$  = 8.0 Hz, 2 H), 7.07 (d,  $J$  = 4.05 Hz, 2 H), 2.36 (s, 3 H).  $^{13}\text{C}$  NMR (125 MHz,  $\text{CDCl}_3$ )  $\delta$ : 137.51, 134.54, 129.38, 128.64, 127.69, 127.39, 126.37, 21.23. EI-MS  $m/z$  = 194 ( $\text{M}^+$ ).

*(E)*-4-Methoxystilbene **4n** [2]: <sup>1</sup>H NMR (500 MHz, CDCl<sub>3</sub>) δ = 7.49-7.44 (m, 4 H), 7.34 (t, *J* = 7.5 Hz, 2 H), 7.26-7.21 (m, 1 H), 7.08 (d, *J* = 16.0 Hz, 1 H), 6.99 (d, *J* = 16.5 Hz, 1 H), 6.90 (d, *J* = 5.0 Hz, 2 H), 3.82 (s, 3 H). <sup>13</sup>C NMR (125 MHz, CDCl<sub>3</sub>) δ: 159.30, 137.64, 130.14, 128.63, 128.20, 127.70, 127.20, 126.61, 126.23, 114.13, 55.31. EI-MS *m/z* = 210 (M<sup>+</sup>).

*(E)*-4-Styrylbenzotrile **4o** [2]: <sup>1</sup>H NMR (500 MHz, CDCl<sub>3</sub>) δ = 7.63 (d, *J* = 8.15 Hz, 2 H), 7.57 (d, *J* = 6.5 Hz, 2 H), 7.53 (d, *J* = 7.45 Hz, 2 H), 7.38 (m, 2 H), 7.31 (t, *J* = 7.45 Hz, 1 H), 7.23 (t, *J* = 16.6 Hz, 1 H), 7.10 (d, *J* = 16.6 Hz, 1 H). <sup>13</sup>C NMR (125 MHz, CDCl<sub>3</sub>) δ: 141.81, 136.26, 132.46, 132.38, 128.84, 128.62, 126.89, 126.83, 126.70, 119.00, 110.56. EI-MS *m/z* = 205 (M<sup>+</sup>).

### **General procedure for the Sonogashira reaction**

Aryl halide (1 mmol), phenylacetylene (1.2 mol equiv), piperidine (2 mol equiv) and the Pd-complex **3** (0.8 mg, 0.02 mol%, 200 mol ppm) was stirred at 80 °C for 2 h monitoring periodically by GC analysis. The reaction mixture was cooled at room temperature and diluted with EtOAc and the immobilized Pd-complex was separated by filtration. The organic layer was washed by H<sub>2</sub>O and dried over MgSO<sub>4</sub>. Solvent was evaporated under reduced pressure and the residue was purified by short column chromatography on silica gel eluted with *n*-hexane/EtOAc to afford the corresponding coupling products in up to 96% yield.

Diphenylacetylene **6a** [3]: <sup>1</sup>H NMR (CDCl<sub>3</sub>, 400 MHz) δ: 7.52-7.47 (m, 4H), 7.35-7.28 (m, 6H). <sup>13</sup>C NMR (CDCl<sub>3</sub>, 125 MHz) δ: 131.5, 128.1, 128.1, 123.2, 89.6. EI-MS *m/z* = 178 (M<sup>+</sup>).

Phenyl-*p*-tolylacetylene **6b** [3]: <sup>1</sup>H NMR (CDCl<sub>3</sub>, 400 MHz) δ: 7.51-7.49 (m, 2 H), 7.42 (d, *J* = 7.89 Hz, 2 H), 7.32-7.26 (m, 3 H), 7.12 (d, *J* = 7.88 Hz, 2 H), 2.32 (s, 3H). <sup>13</sup>C NMR (CDCl<sub>3</sub>, 125 MHz) δ: 138.2, 131.4, 129.2, 128.3, 128.3, 123.4, 120.3, 89.7, 88.6, 21.5. EI-MS *m/z* = 192 (M<sup>+</sup>).

4-Methoxyphenyl-phenylacetylene **6c** [3]: <sup>1</sup>H NMR (CDCl<sub>3</sub>, 400 MHz) δ: 7.51-7.47 (m, 4 H), 7.35-7.31 (m, 3 H), 6.85 (dd, *J* = 8.78, 2.2 Hz, 2 H), 3.83 (s, 3 H). <sup>13</sup>C NMR (CDCl<sub>3</sub>, 125 MHz) δ: 159.3, 133.2, 131.2, 128.4, 127.8, 123.6, 115.4, 114.0, 89.4, 88.1, 55.2. EI-MS *m/z* = 208 (M<sup>+</sup>).

*4-Acetylphenyl-phenylacetylene 6d* [3]:  $^1\text{H}$  NMR ( $\text{CDCl}_3$ , 400 MHz)  $\delta$ : 7.92 (d,  $J = 8.49\text{ Hz}$ , 2 H), 7.60 (d,  $J = 8.49\text{ Hz}$ , 2 H), 7.55-7.53 (m, 2H), 7.37-7.34 (m, 3 H), 2.59 (s, 3H).  $^{13}\text{C}$  NMR ( $\text{CDCl}_3$ , 125 MHz)  $\delta$ : 197.2, 136.3, 131.9, 131.7, 128.9, 128.6, 128.1, 128.1, 122.5, 92.8, 88.4, 26.7. EI-MS  $m/z = 220$  ( $\text{M}^+$ ).

*4-Cyanophenyl-phenylacetylene 6e* [4]:  $^1\text{H}$  NMR ( $\text{CDCl}_3$ , 400 MHz)  $\delta$ : 7.66-7.59 (m, 4 H), 7.57-7.54 (m, 2 H), 7.41-7.38 (m, 3 H).  $^{13}\text{C}$  NMR ( $\text{CDCl}_3$ , 125 MHz)  $\delta$ : 132.1, 131.7, 129.2, 128.6, 128.3, 122.3, 118.6, 111.5, 93.8, 87.8. EI-MS  $m/z = 203$  ( $\text{M}^+$ ).

*4-Nitrophenyl-phenylacetylene 6f* [3]:  $^1\text{H}$  NMR ( $\text{CDCl}_3$ , 400 MHz)  $\delta$ : 8.20 (d,  $J = 8.92\text{ Hz}$ , 2 H), 7.65 (d,  $J = 8.90\text{ Hz}$ , 2 H), 7.57-7.54 (m, 2 H), 7.41-7.37 (m, 3H).  $^{13}\text{C}$  NMR ( $\text{CDCl}_3$ , 125 MHz)  $\delta$ : 147.1, 132.1, 131.9, 130.3, 129.3, 128.6, 123.8, 122.1, 94.8, 87.6. EI-MS  $m/z = 223$  ( $\text{M}^+$ ).

### ***General procedure for the Suzuki reaction***

A mixture of aryl halide (1 mmol), boronic acid (1.1 mol equiv),  $\text{K}_2\text{CO}_3$  (2 mol equiv), and the Pd-complex **3** (0.4 mg, 0.01 mol%, 100 mol ppm) in aqueous ethanol (1:1) was stirred at 90 °C for 6 h. The reaction was monitored with GC until the complete consumption of the aryl halide. The Pd-complex **3** was separated by filtration and the reaction mixture was diluted with  $\text{H}_2\text{O}$  and ether. The organic layer was dried over  $\text{MgSO}_4$  and then evaporated under reduced pressure. The residue was purified by short column chromatography on silica gel to give the corresponding coupling product in up to 94% isolated yield.

*4-Methoxybiphenyl 5a* [5]:  $^1\text{H}$  NMR (500 MHz,  $\text{CDCl}_3$ )  $\delta = 3.83$  (s, 3 H), 6.97 (d,  $J = 8.6\text{ Hz}$ , 2 H), 7.30 (t,  $J = 8.0\text{ Hz}$ , 1 H), 7.42 (t,  $J = 8.0\text{ Hz}$ , 2 H), 7.51-7.55 (m, 4 H);  $^{13}\text{C}$  NMR (125 MHz,  $\text{CDCl}_3$ )  $\delta = 55.2$ , 114.2, 126.7, 128.1, 128.2, 128.7, 133.7, 140.8, 159.1; FTIR ( $\text{cm}^{-1}$ ): 3032, 3010, 2836, 1609, 1518, 1485, 1440, 1291, 1261, 1245, 1215, 1043, 833, 746, 719, 697; MS-EI,  $m/z$  184 ( $\text{M}^+$ ).

*4-Methylbiphenyl 5b* [5]:  $^1\text{H}$  NMR (500 MHz,  $\text{CDCl}_3$ )  $\delta$  = 2.39 (s, 3 H), 7.25 (d,  $J$  = 8.0 Hz, 2 H), 7.31 (t,  $J$  = 7.4 Hz, 1 H), 7.42 (t,  $J$  = 7.4 Hz, 2 H), 7.49 (d,  $J$  = 8.0 Hz, 2 H), 7.58 (d,  $J$  = 8.0 Hz, 2 H);  $^{13}\text{C}$  NMR (125 MHz,  $\text{CDCl}_3$ )  $\delta$  = 21.0, 126.9, 127.0, 128.6, 129.4, 137.0, 138.3, 141.1; FTIR ( $\text{cm}^{-1}$ ): 3031, 2920, 2859, 1601, 1518, 1486, 1445, 1216, 1111, 1038, 1007, 821, 746, 696; MS-EI,  $m/z$  168 ( $\text{M}^+$ ).

*Biphenyl-4-ol 5c* [5]:  $^1\text{H}$  NMR (500 MHz,  $\text{CDCl}_3$ )  $\delta$  = 4.96 (brs, 1 H), 6.62 (d,  $J$  = 8.6 Hz, 2 H), 6.91 (d,  $J$  = 8.6 Hz, 1 H), 7.30 (t,  $J$  = 7.4 Hz, 1 H), 7.41 (t,  $J$  = 7.4 Hz, 1 H), 7.47-7.54 (m, 4 H);  $^{13}\text{C}$  NMR (125 MHz,  $\text{CDCl}_3$ )  $\delta$  = 115.6, 126.6, 128.3, 128.7, 134.0, 140.7, 155.3; FTIR ( $\text{cm}^{-1}$ ): 3362, 3019, 1582, 1485, 1257, 1213, 1171, 1006, 822, 742, 698, 667; MS-EI,  $m/z$  170 ( $\text{M}^+$ ).

*Biphenyl-4-amine 5d* [5]:  $^1\text{H}$  NMR (500 MHz,  $\text{CDCl}_3$ )  $\delta$  = 3.66 (brs, 2 H), 6.45 (d,  $J$  = 8.6 Hz, 2 H), 6.75 (d,  $J$  = 8.6 Hz, 1 H), 7.26 (t,  $J$  = 7.4 Hz, 1 H), 7.37-7.42 (m, 4 H), 7.52 (d,  $J$  = 7.4 Hz, 1 H);  $^{13}\text{C}$  NMR (125 MHz,  $\text{CDCl}_3$ )  $\delta$  = 115.3, 117.2, 126.3, 127.9, 128.6, 131.5, 135.4, 137.8, 141.0, 145.9; FTIR ( $\text{cm}^{-1}$ ): 3452, 3368, 3215, 3025, 2922, 1617, 1588, 1484, 1297, 1177, 1058, 1000, 814, 751, 689; MS-EI,  $m/z$  169 ( $\text{M}^+$ ).

*4,4'-dimethylbiphenyl 5e* [5]:  $^1\text{H}$  NMR (500 MHz,  $\text{CDCl}_3$ )  $\delta$  = 2.38 (s, 6 H), 7.23 (dd,  $J$  = 8.0, 1.7 Hz, 4 H), 7.47 (dd,  $J$  = 8.0, 1.7 Hz, 4 H);  $^{13}\text{C}$  NMR (125 MHz,  $\text{CDCl}_3$ )  $\delta$  = 21.0, 126.7, 129.4, 136.6, 138.2; FTIR ( $\text{cm}^{-1}$ ): 3032, 2924, 2854, 1500, 1214, 1111, 1002, 803, 746, 668; MS-EI,  $m/z$  182 ( $\text{M}^+$ ).

*4-Acetyl- 1,1'-biphenyl 5f* [5]:  $^1\text{H}$  NMR (500 MHz,  $\text{CDCl}_3$ )  $\delta$  = 2.64 (s, 3 H), 7.47 (t,  $J$  = 7.4 Hz, 2 H), 7.62-7.69 (m, 5 H), 8.04 (d,  $J$  = 8.5 Hz, 2 H);  $^{13}\text{C}$  NMR (125 MHz,  $\text{CDCl}_3$ )  $\delta$  = 26.6, 127.2, 128.1, 128.9, 129.7, 135.8, 137.9, 139.8, 145.7, 197.7; FTIR ( $\text{cm}^{-1}$ ): 3073, 3001, 1676, 1591, 1485, 1391, 1357, 1262, 1179, 1076, 1005, 958, 835, 754, 690; MS-EI,  $m/z$  196 ( $\text{M}^+$ ).

## References

- [1] T. Mino, Y. Shirae, Y. Sasai, M. Sakamoto, T. Fujita, *J. Org. Chem.* 71 (2006) 6834.
- [2] H. J Xu, Y.Q Zhao, X.F Zhou, *J. Org. Chem.* 76 (2011) 8036.

- [3] T. Mino, Y. Shirae, T. Saito, M. Sakamoto, T. Fujita, *J. Org. Chem.* **2006**, *71*, 9499.
- [4] H. Huang, H. Liu, H. Jiang, K. Chen, *J. Org. Chem.* **2008**, *73*, 6037.
- [5] Y. M. A. Yamada, S. M. Sarkar, Y. Uozumi, *J. Am. Chem. Soc.* **2012**, *134*, 3190.
